# Supplementary material for: The Antimicrobial Peptide Human β-Defensin-3 Accelerates Wound Healing by Promoting Angiogenesis, Cell Migration, and Proliferation Through the FGFR/JAK2/STAT3 Signaling Pathway
Source: Frontiers journal article supplement (doi:10.3389/fimmu.2021.712781), 2021-09-14
Supplement: Data_Sheet_1.pdf [file Data_Sheet_1.pdf]

# The antimicrobial peptide human $\beta$ -defensin-3 accelerates wound healing by promoting angiogenesis, cell migration and proliferation through the FGFR/JAK2/STAT3 signaling pathway

Miho Takahashi<sup>1,2</sup>, Yoshie Umehara<sup>1</sup>, Hainan Yue<sup>1,2</sup>, Juan Valentin Trujillo-Paez<sup>1</sup>, Ge Peng<sup>1,2</sup>, Hai Le Thanh Nguyen<sup>1,2</sup>, Risa Ikutama<sup>1,2</sup>, Ko Okumura<sup>1</sup>, Hideoki Ogawa<sup>1,2</sup>, Shigaku Ikeda<sup>1,2</sup>, François Niyonsaba<sup>1,3\*</sup>

<sup>1</sup>Atopy (Allergy) Research Center, Juntendo University Graduate School of Medicine, Tokyo, Japan

<sup>2</sup>Department of Dermatology and Allergology, Juntendo University Graduate School of Medicine, Tokyo, Japan

<sup>3</sup>Faculty of International Liberal Arts, Juntendo University, Tokyo, Japan

## \* Correspondence:

François Niyonsaba, Atopy (Allergy) Research Center and Faculty of International Liberal Arts, Juntendo University, 2-1-1 Hongo, Bunkyo-ku, Tokyo 113-8421, Japan

Email address: francois@juntendo.ac.jp

Telephone number: +81-3-5802-1591; Fax number: +81-3-3813-5512

**Keywords:** angiogenesis, human  $\beta$ -defensin, fibroblast, migration, proliferation, wound healing

**Running title:** Human  $\beta$ -defensin-3 promotes wound healing

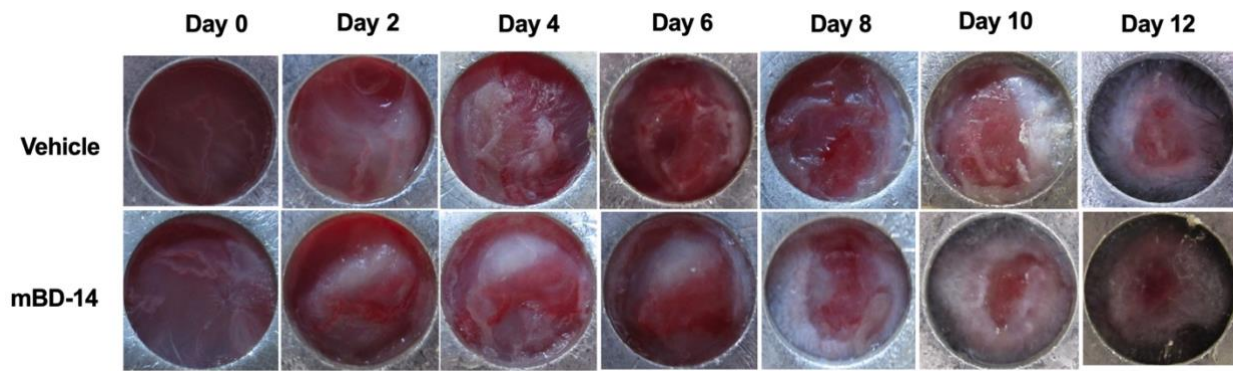

*Figure S1. mBD-14 accelerates wound closure in vivo*

Dorsal full-thickness skin wounds were created on mice and then topically treated with 0.01% acetic acid (vehicle) and 200  $\mu\text{g/ml}$  mBD-14. Representative images of skin wounds from day 0 to day 12.

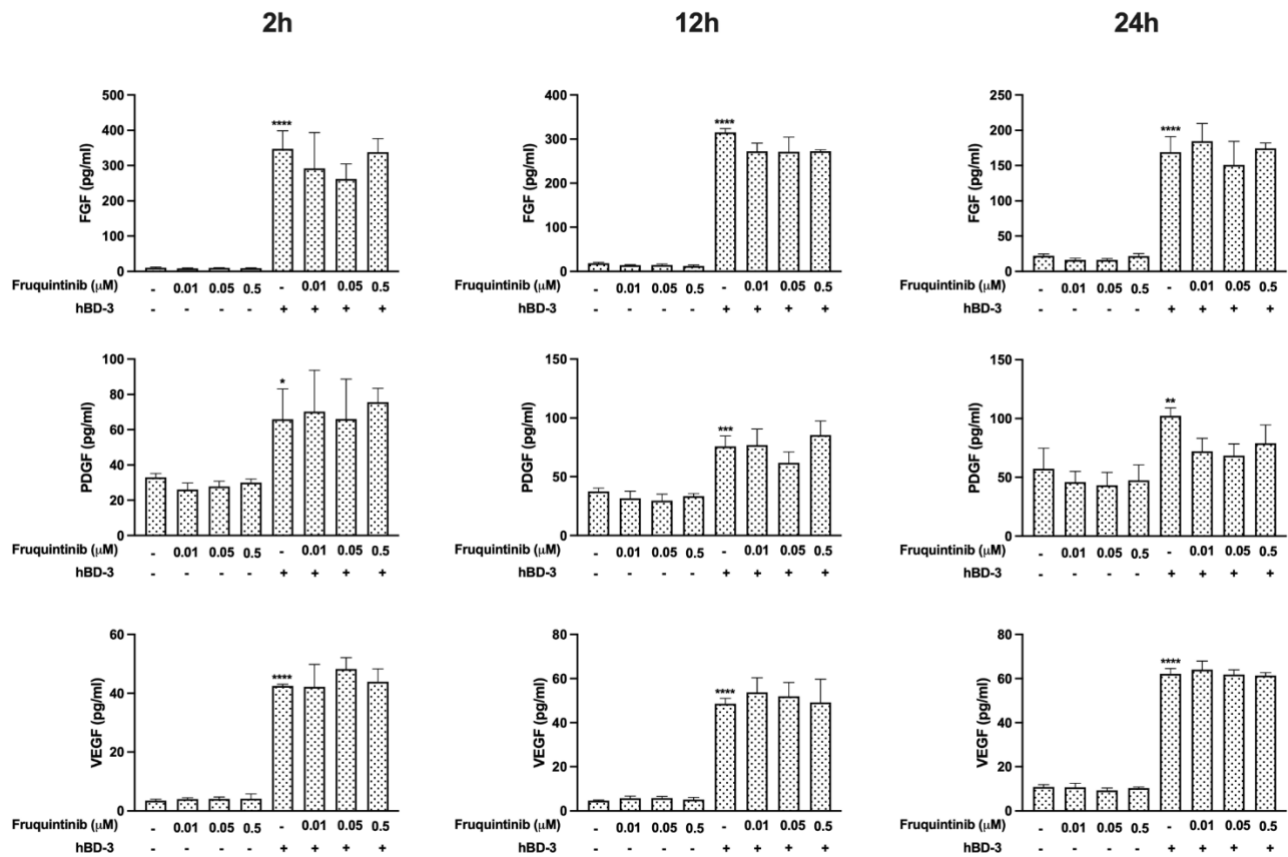

**Figure S2. VEGFR is not involved in hBD-3-mediated production of angiogenic growth factors**

Fibroblasts were pretreated with 0.1% DMSO (vehicle) or 0.01 to 0.5  $\mu$ M fruquintinib (VEGFR inhibitor) for 2 to 24 hours and then exposed to 20  $\mu$ g/ml hBD-3. The amounts of VEGF (upper panels), PDGF (middle panels) and FGF (lower panels) in culture supernatants were measured by appropriate ELISAs. The *P* value was determined using one-way ANOVA with Tukey's multiple comparisons test. \* *P* < 0.05, \*\* *P* < 0.01, \*\*\* *P* < 0.001, and \*\*\*\* *P* < 0.0001 for comparisons between the nonstimulated cells and the hBD-3-stimulated cells without inhibitors. NS (not significant) for comparisons between the hBD-3-stimulated cells in the presence or absence of inhibitor, *n* = 3.

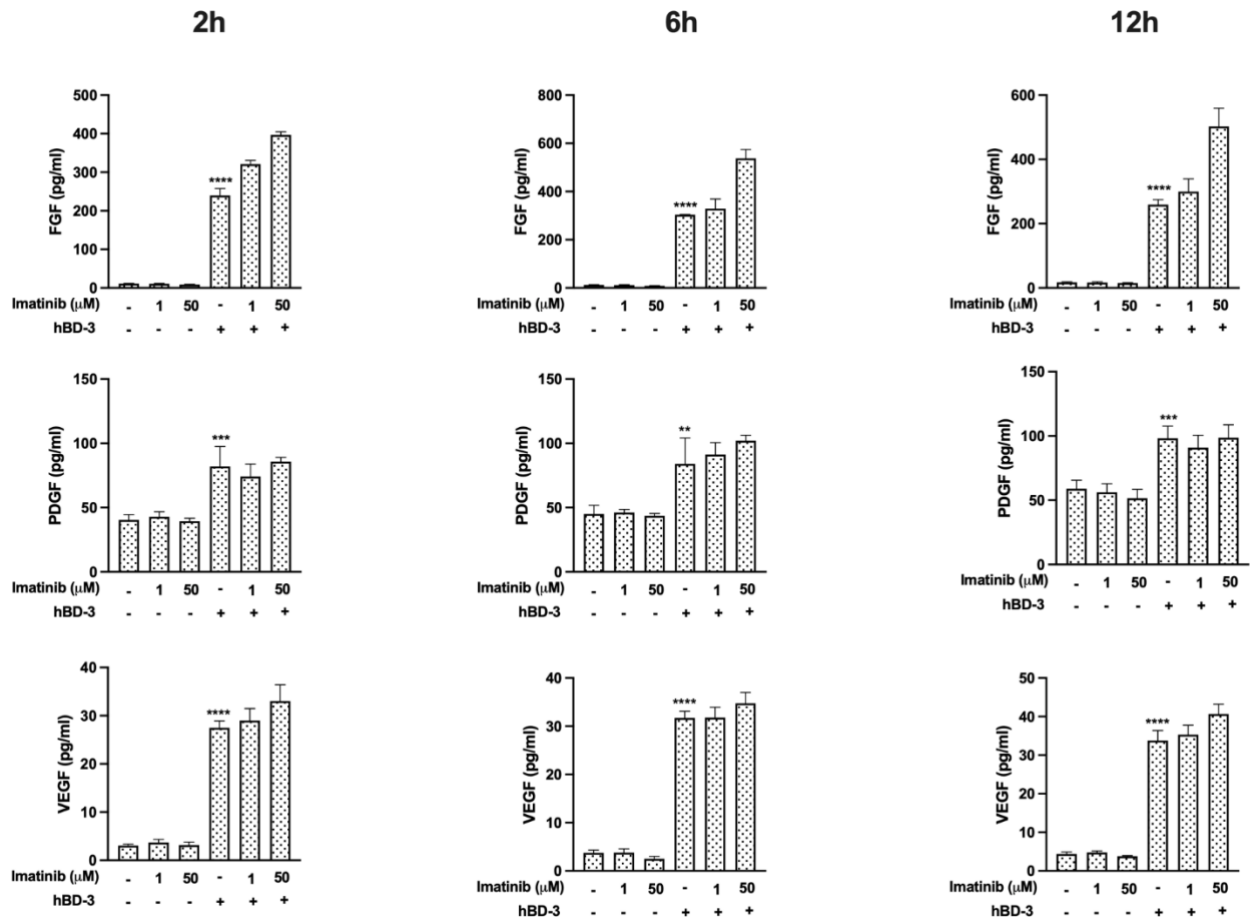

**Figure S3. PDGFR is not required for hBD-3-mediated production of angiogenic growth factors**

Fibroblasts were pretreated with 0.1% DMSO (vehicle) or 1 to 50  $\mu$ M imatinib (PDGFR inhibitor) for 2 to 12 hours and then exposed to 20  $\mu$ g/ml hBD-3. The amounts of VEGF (upper panels), PDGF (middle panels) and FGF (lower panels) in culture supernatants were measured by appropriate ELISAs. The  $P$  value was determined using one-way ANOVA with Tukey's multiple comparisons test. \*\*  $P < 0.01$ , \*\*\*  $P < 0.001$ , and \*\*\*\*  $P < 0.0001$  for comparisons between the nonstimulated cells and the hBD-3-stimulated cells without inhibitors. NS (not significant) for comparisons between the hBD-3-stimulated cells in the presence or absence of inhibitor,  $n = 3$ .

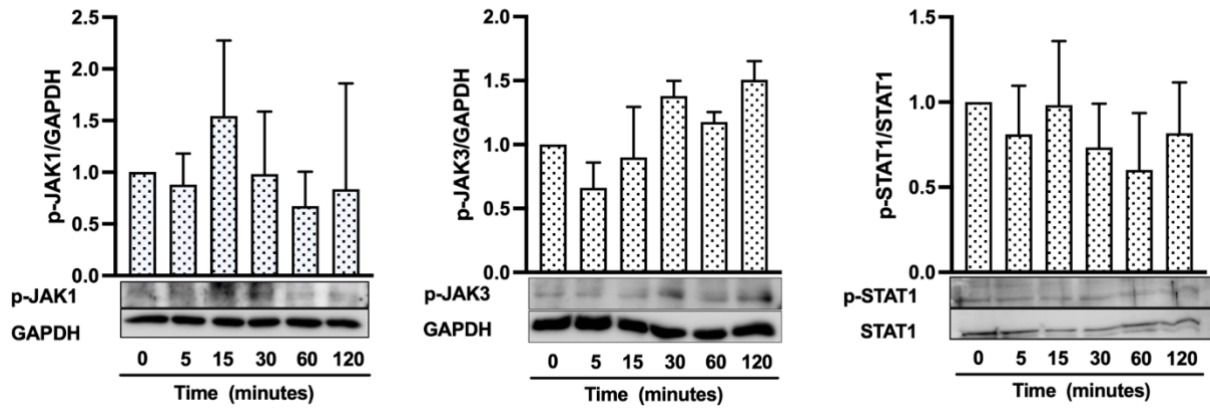

**Figure S4. hBD-3 does not affect the phosphorylation of JAK1, JAK3 and STAT1**

Fibroblasts were stimulated with 20  $\mu$ g/ml hBD-3 for 5 minutes to 120 minutes and then subjected to Western blotting using antibodies against phosphorylated or unphosphorylated JAK1, JAK3 and STAT1. 0 minutes: nonstimulated cells. Bands were quantified using densitometry.

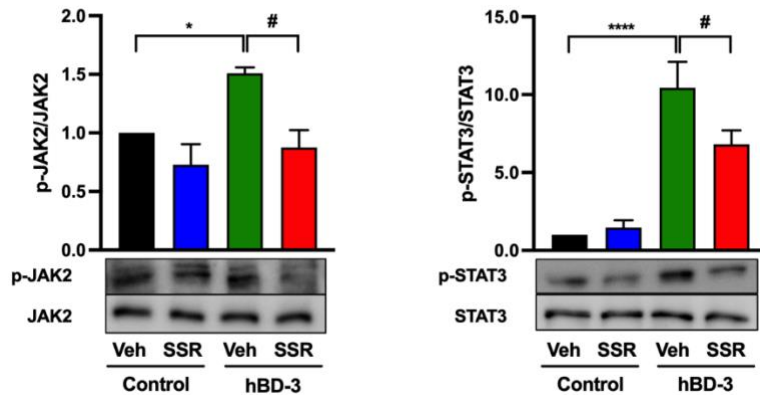

**Figure S5. FGFR inhibitor suppresses hBD-3-induced phosphorylation of JAK2 and STAT3**

Fibroblasts were pretreated with 0.1% DMSO (vehicle) or 1  $\mu$ M SSR 128129E (FGFR inhibitor, SSR) for 2 hours and then exposed to 20  $\mu$ g/ml hBD-3 for 15 minutes (JAK2) and for 120 minutes (STAT3) and subjected to Western blotting using antibodies against phosphorylated or unphosphorylated JAK2 (A) and STAT3 (B). Bands were quantified using densitometry. *P* value was conducted using one-way ANOVA with Tukey's multiple comparisons test. \* *P* < 0.05 and \*\*\* *P* < 0.001 for comparisons between the nonstimulated cells (Control) and the hBD-3-stimulated cells without inhibitors. # *P* < 0.05 for comparisons between hBD-3-stimulated cells in the presence or absence of inhibitor, *n* = 3.
